# Supplementary material
Source: PubMed Central journal article supplement (PMC5378107)
Supplement: 1473file011.pdf [file 1473file011.pdf]

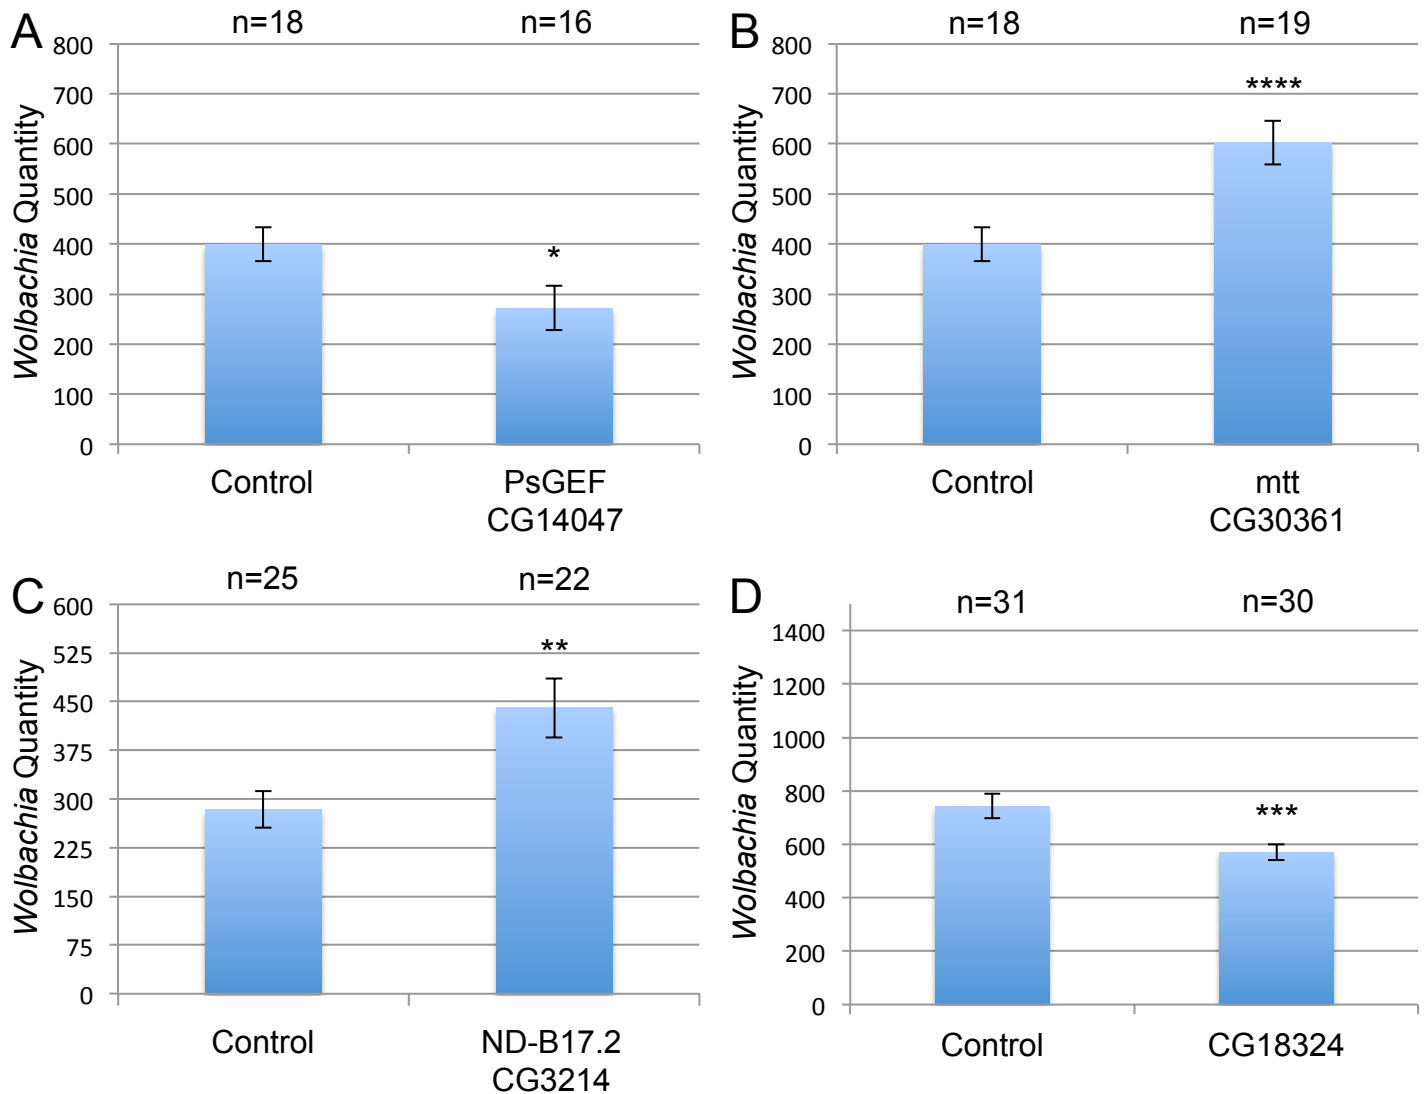

**Figure S1 *In vivo* validation of genes that reduce *Wolbachia***

Adult females had the gene of interest knocked down using tissue-specific expression of dsRNA targeting specific host genes: (A) PsGEF, (B) mtt, (C) NB-B17.2 and (D) CG18324. The graphs represent quantification of *Wolbachia* nucleoids from single oocyte focal planes. ANOVA analysis indicated that the dsRNA knockdowns significantly altered oocyte *Wolbachia* titer in all cases ( $p < 0.005$ ). Error bars indicate standard error of the mean.
